# Supplementary material
Source: PubMed Central journal article supplement (PMC6556402)

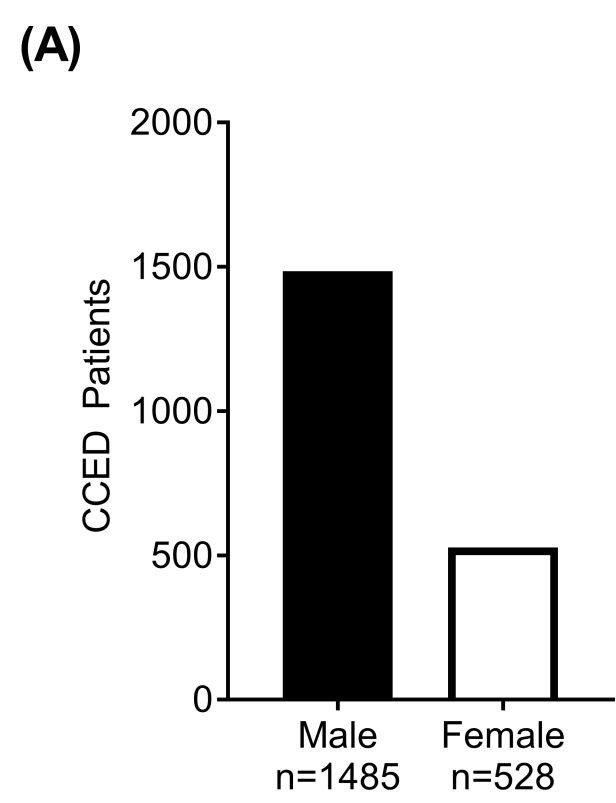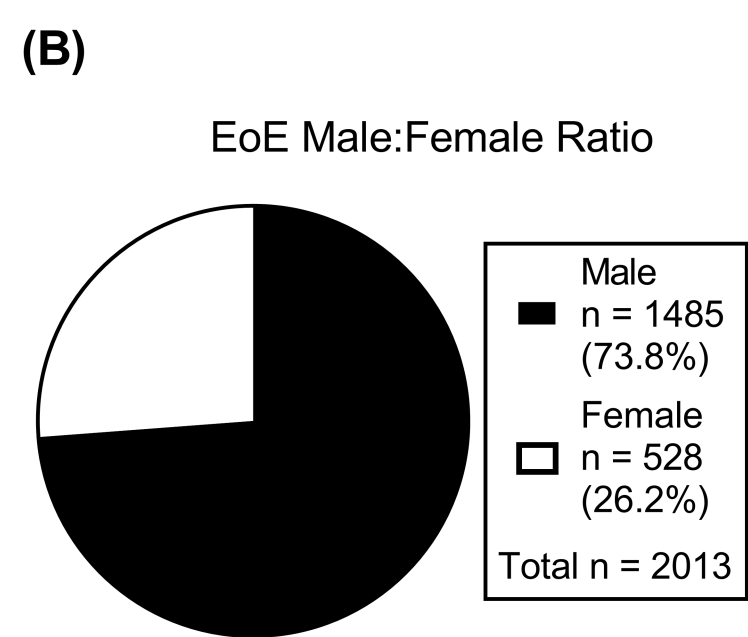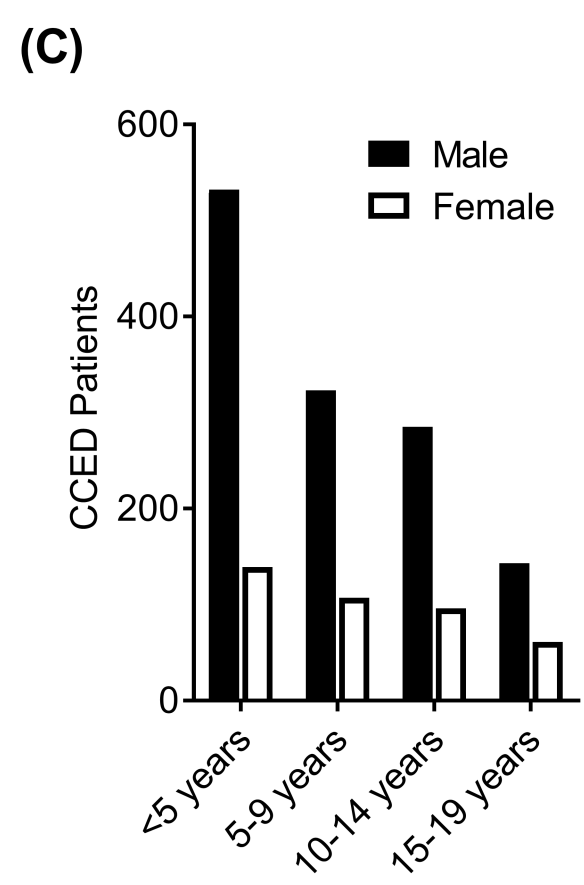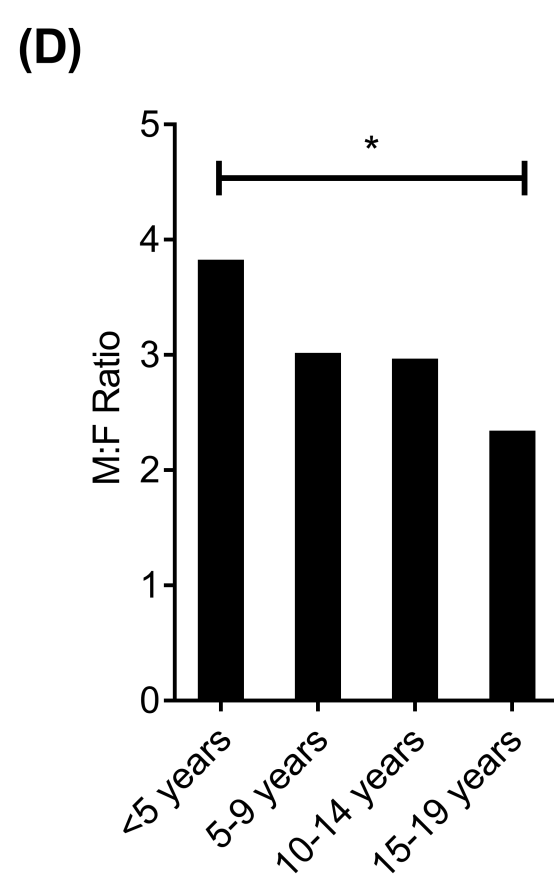

Supplement: NIHMS1015718-supplement-Figure_E1.pdf [file NIHMS1015718-supplement-Figure_E1.pdf]
